# Supplementary material for: Considerations regarding safety with pulsed field ablation for atrial fibrillation
Source: PubMed Central journal article supplement — Heart Rhythm O2. 2024 Aug 10;5(9):655–61. doi: 10.1016/j.hroo.2024.08.002 (PMC11524966; doi:10.1016/j.hroo.2024.08.002), 2024-08-10
Supplement: mmc1.pdf [file mmc1.pdf]

ELSEVIER LICENSE  
TERMS AND CONDITIONS

Jul 17, 2024

---

---

This Agreement between Alan Sugrue ("You") and Elsevier ("Elsevier") consists of your license details and the terms and conditions provided by Elsevier and Copyright Clearance Center.

License Number 5831370745583

License date Jul 17, 2024

Licensed Content Publisher Elsevier

Licensed Content Publication Heart Rhythm

Licensed Content Title Pulsed electric fields for cardiac ablation and beyond: A state-of-the-art review

Licensed Content Author Elad Maor,Alan Sugrue,Chance Witt,Vaibhav R. Vaidya,Christopher V. DeSimone,Samuel J. Asirvatham,Suraj Kapa

Licensed Content Date Jul 1, 2019

Licensed Content Volume 16

Licensed Content Issue 7

Licensed Content Pages 9
